# Supplementary material for: HDAC6 Deficiency Has Moderate Effects on Behaviors and Parkinson’s Disease Pathology in Mice
Source: MDPI journal article supplement (doi:10.3390/ijms24129975), 2023-06-09
Supplement: s1 [file s1]

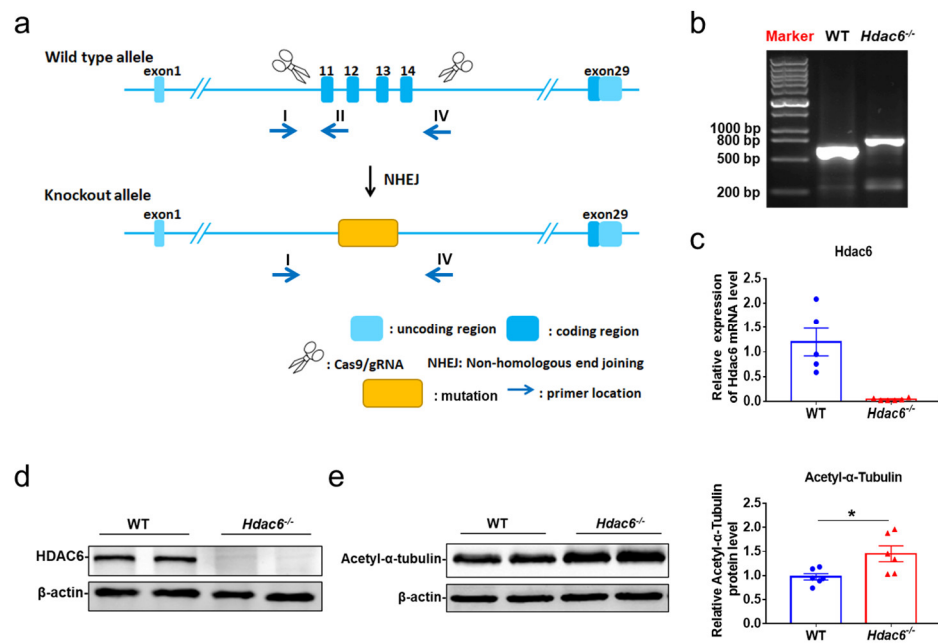

**Figure S1.** The targeting strategy and validation of HDAC6 deficiency in mice. (a) The construction strategy of *Hdac6*<sup>-/-</sup> mice. (b) Genotyping of *Hdac6*<sup>-/-</sup> mice. PCR primers used are indicated as primers I, II, IV. (c) Verification of HDAC6 deficiency in the brain of *Hdac6*<sup>-/-</sup> mice by qPCR. n=5-6. (d) Verification of HDAC6 deficiency in the brain of *Hdac6*<sup>-/-</sup> mice by Western blot. (e) The effect of HDAC6 deficiency on the acetylation of  $\alpha$ -tubulin in the striatum of mice. n=6, \**p* < 0.05.

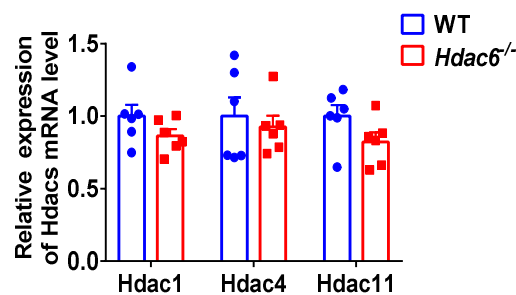

**Figure S2.** The transcripts of *Hdac1*, *Hdac4* and *Hdac11* in the brain of WT and *Hdac6*<sup>-/-</sup> mice detected by qPCR. n=6.

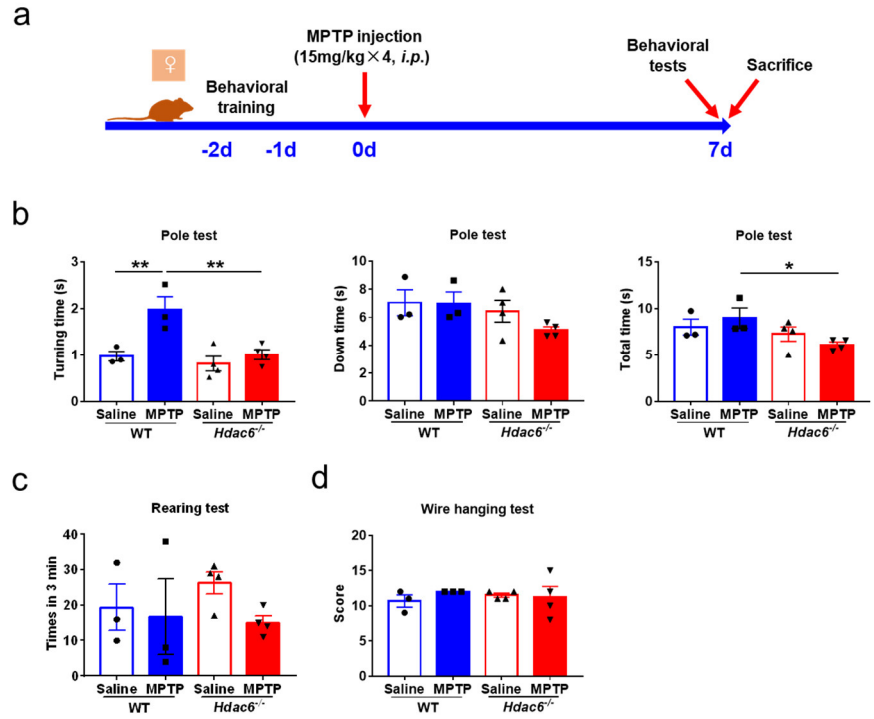

**Figure S3.** The effects of HDAC6 loss on PD-related motor injuries induced by MPTP injection in female WT and *Hdac6*<sup>-/-</sup> mice. **(a)** The experimental schedule. **(b, c, d)** PD-related behavioral tests were performed in mice at 7 days after the last injection of MPTP or NS. **(b)** The results of pole test. **(c)** The results of rearing test. **(d)** The results of wire hanging test. *n*=3-4, \**p* < 0.05, \*\**p* < 0.01.

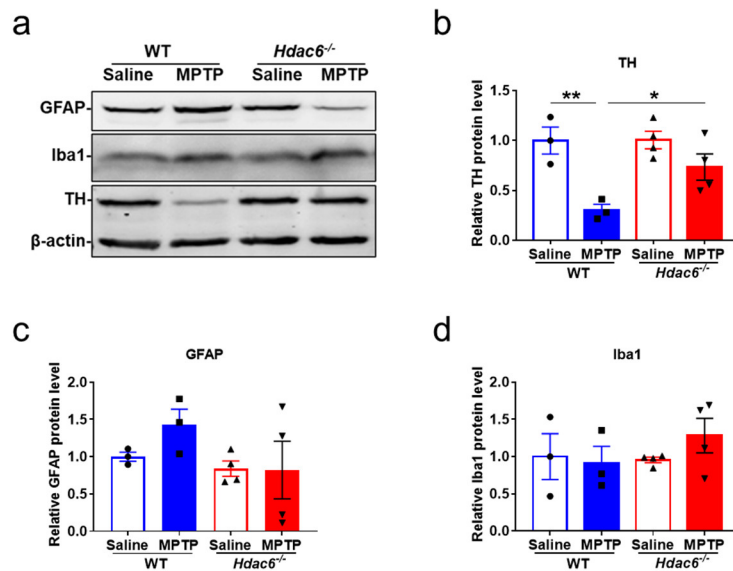

**Figure S4.** The impact of HDAC6 deficiency on MPTP-induced changes in the striatum of female WT and *Hdac6*<sup>-/-</sup> mice at 7 days after MPTP administration. **(a)** Representative western blot of striatal TH, GFAP and Iba1 proteins,  $\beta$ -actin served as the control. **(b-d)** Quantification of TH protein levels **(b)**, GFAP protein levels **(c)**, and Iba1 protein levels **(d)**. *n*=3-4, \**p* < 0.05, \*\**p* < 0.01.

## Supplementary Table

Table S1. The main results

| Direction            | Index                                    | Male   |      |                             |      | Female |        |                             |        |
|----------------------|------------------------------------------|--------|------|-----------------------------|------|--------|--------|-----------------------------|--------|
|                      |                                          | WT     |      | <i>Hdac6</i> <sup>-/-</sup> |      | WT     |        | <i>Hdac6</i> <sup>-/-</sup> |        |
|                      |                                          | Saline | MPTP | Saline                      | MPTP | Saline | MPTP   | Saline                      | MPTP   |
| Behaviors            | Motor activity                           |        | ○    | ↑                           | ○    |        | ○      | ↓                           | ○      |
|                      | Anxiety or depression                    |        | ○    | ↑                           | ○    |        | ○      | ↓                           | ○      |
| PD-related behaviors | Motor ability                            |        | ↓    | -                           | -↑   |        | ↓      | -                           | -↑     |
|                      | Limb strength                            |        | ↓    | -                           | -    |        | -      | -                           | -      |
| DA system            | Striatal TH proteins                     |        | ↓    | -                           | ↓    |        | ↓      | -                           | -↑     |
| Inflammation         | Activation of astrocyte in SNpc (7d)     |        | ↑    | -                           | ↑    |        | ○      | ○                           | ○      |
|                      | Activation of microglia in SNpc (3d)     |        | ↑    | -                           | ↑    |        | ○      | ○                           | ○      |
|                      | Activation of astrocyte in striatum (7d) |        | ↑    | -                           | -    |        | -      | -                           | -      |
|                      | Activation of microglia in striatum (3d) |        | ↑    | -                           | -    |        | - (7d) | - (7d)                      | - (7d) |

↑ ↓: enhancement or reduction vs. respective saline control; ↑ ↓: enhancement or reduction vs. WT saline control;

↑ : enhancement vs. WT MPTP group; - : no change vs. respective saline control; - : no change vs. WT saline control;

○: not tested.
